# Supplementary material for: In vivo generation of bone marrow from embryonic stem cells in interspecies chimeras
Source: eLife. 2022 Sep 30;11:e74018. doi: 10.7554/eLife.74018 (PMC9578712; doi:10.7554/eLife.74018)
Supplement: Source data 1. [file elife-74018-data1.xlsx]

## Sheet: Figure 1
Figure 1C
	rat
	p3	8.69	9.71	9.84	10.03	10.06	10.19	10.21	10.42	10.93
	p8	19.63	19.03	18.8	18.76	18.67	18.58	20.64	20.69	21.47	21.06	22.34	22.5
	p13	29.09	30.43	30.45	30.95	31.05	31.28	31.84	32.01	32.25	32.38
	p18	38.56	40.76	40.76	40.89	41.21	41.43	42.53	43.22	43.48	44.41
	chimera
	p3	6.74	7.71	4.97	5.67	6.6	7.64	7.93	5.35	6.2	7.18	6.88	7.27
	p8	10.39	11.85	5.17	5.05	10.49	10.93	7.79	10.76	10.78
	p13	18.39	21.87	13.59	14.95	15.97	16.94	13.75	19.56
	p18	20.02	26.92	19.62	20.25	29.72	30.56	32.6	32.3
	mouse
	p3	3.13	2.53	3.03	2.66	2.92	2.99	2.35	2.66	2.77	2.85
	p8	4.66	4.59	4.96	4.68	3.8	4.45	4.19	3.72	4.63	4.29	4.31	4.28	4.05	4.11	4.38	4.18	3.99
	p13	6.19	6.29	6.6	6.33	6.27	5.7	6.13
	p18	8.13	7.27	8.22	8.35	7.68	8.15	7.1	7.91	9.25	9.27	9.37	9.54	9.62	7.72	7.44	8.67	7.83	7.67
Figure 1F
	mouse	chimera
	0	48.7
	0	9.91
	0	14
	0	30.4
	0	16.6
	0	17.5
	0	17.4
	0	16.8
		53.1
		25.3
Figure 1G
	lin-		LSK
	mouse	chimera	mouse	chimera
	4.64	4.46	0.72	1.64
	5.11	9.63	1.16	3.73
	3.15	1.31	1.2	1.82
	2	2.83	2.19	14.4
	3.13	3.21	2.22	7.96
	4.41	3.76	1.44	12
	4.82	6.29	1.74	10.7
	8.29	1.27	2.2	11.4
		2.74		9.58
		2.3		3.36
Figure 1H
	ST-HSC		LT-HSC
	mouse	chimera	mouse	chimera
	5.08	4.63	4.24	0.93
	3.85	3.01	1.92	4.51
	5.41	25	1.35	37.5
	2.87	20	0.57	33.3
	6.16	4	3.62	8
	4.98	9.76	2.49	12.2
	4.72	7.69	1.57	15.4
	0.82	3.28	1.34	6.56
		6.25		12.5
		18.8		3.12
Figure 1I
	Mouse	chimera
	16	20
	17	135
	13	75
	8	153
	34	495
	24	777
	26	71
	20	246
		85
		314

## Sheet: Figure 5
Figure 5C
	gfp	lineage-	LSK	ST-HSC	LT-HSC
chimera	0.0334	0.234	0.056	0.311	0.0777
	0.0443	0.248	0.0654	0.419	0.0135
	0.0172	0.284	0.0717	0.301	0.0548
	0.0354	0.248	0.0623	0.265	0.0973
	0.0517	0.282	0.0622	0.35	0.0148
	0.0227	0.313	0.0837	0.328	0.0312
mouse	0	0.0916	0.0089	0.193	0.0521
	0	0.123	0.0072	0.298	0.154
	0	0.111	0.0117	0.133	0.0785
	0	0.0668	0.0167	0.0385	0.37

## Sheet: Figure 7
Figure 7A	WBC						RBC						Lymphocytes						Neutrophil						Monocytes
	no IR 8 days	IR 8 days	IR+BMC 8 days	no IR 5 months	IR+BMC 5 months		no IR 8 days	IR 8 days	IR+BMC 8 days	no IR 5 months	IR+BMC 5 months		no IR 8 days	IR 8 days	IR+BMC 8 days	no IR 5 months	IR+BMC 5 months		no IR 8 days	IR 8 days	IR+BMC 8 days	no IR 5 months	IR+BMC 5 months		no IR 8 days	IR 8 days	IR+BMC 8 days	no IR 5 months	IR+BMC 5 months
	6.54	0.18	0.26	9.02	5.64		8.78	4.86	5.2	8.48	8.63		4.26	0	0.16	6.03	3.29		1.91	0	0.05	2.22	1.94		0.35	0	0.03	0.37	0.4
	7.84	0.1	0.18	3.12	9.14		9.1	5.5	2.22	5.69	8.41		4.47	0	0.13	2.72	6.41		2.44	0	0.02	0.24	2.2		0.41	0	0.01	0.16	0.43
	4	0.12	0.2	5.44	3.92		9.42	5.97	2.25	6.61	8.18		2.75	0	0.15	4.46	2.27		0.84	0	0.03	0.76	1.36		0.31	0	0	0.19	0.28
	6.94	0.26	0.28	5.6	3.76		8.15	5.94	4.66	9.52	7.94		5.08	0	0.2	7.59	2.57		1.8	0	0.05	2.47	1.02		0.04	0	0.02	0.54	0.15
	3.86	0.14	0.34	4.78	4.02		6.13	2.37	5.15	8.59	7.92		2.34	0	0.26	7.7	2.54		1.17	0	0.06	2.21	1.3		0.22	0	0	0.38	0.13
	2.58	0.18	0.24	9.26	7.58		8.38	2.22	6.38	8.44	8.54		1.23	0	0.15	7.09	5.24		1.19	0	0.08	1.94	1.75		0.15	0	0.01	0.19	0.27
	3.86	0.18	0.22	9.52	6.08		8.19	7.9	6.4	7.36	7.98		2.71	0	0.14	3.21	3.1		0.93	0	0.06	1.11	2.42		0.22	0	0.01	0.17	0.42
	5.6	0.22	0.38	3.36	8.52		8.91	7.58	5.2	6.6	9.23		3.69	0	0.25	2.85	5.63		1.28	0	0.1	0.4	2.22		0.37	0	0.03	0.09	0.4
	5.1	0.1	0.3	5.88	9.72		8.81	6.08	5.2	8.57	8.28		4.64	0	0.18	5.2	7.28		0.3	0	0.1	0.45	2.02		0.14	0	0.01	0.22	0.38
	7.62	0.04		8.52	5.86		9.55	6.05		9.48	8.17		4.92	0		7.03	4.75		2.41	0		1.12	0.7		0.18	0		0.34	0.39
	7.02	0.12		9.14	5.4		6.13	5.35		9.26	8.08		5.97	0		6.89	3.89		0.86	0		1.94	1.16		0.18	0		0.3	0.32
	8.74			9.9	6.14		9.3			6.04	8.93		6.86			4.11	4.42		1.57			1.45	1.35		0.24			0.23	0.36
	9.82			6.42	5.8		5.83			9.51	9.35		7.61			5.18	4.22		1.71			1.77	1.51		0.33			0.43	0.07
	4.98				2.88		7.41				6.56		4.07				2.24		0.74				0.51		0.14				0.11
					10.98						8.59						8.05						2.58						0.25
Figure 7B
	Granulocytes	B cells	Monocytes	T cells	Erythroid
	82.7	100	93.3	100	11.4
	84.9	76.8	83.3	60	47.8
	80	0	91.7	0	0.42
	86.4	81.8	88.6	75	16.7
	90.4	76.9	93.3	26	44.8
	87.4	50	88.9	10.4	35.7
	84.1	57.6	97.1	0	0
	84.2	87.6	85.5	20.1	37.5
	81.7	0	81.8	0	1.94
	81.6	40	84.9	0	61.5
	82.8	0	100	0	0
	84.4	100	88.1	0	4
	83.6	100	97.2	57.1	0
	84.1	100	71.4	0	0
	85.1	37.5	86.5	50	0.049
	81.4	81.8	90.3	0	0
Figure 7C
	Granulocytes	B cells	Monocytes	T cells	Erythroid
	70.9	80.8	90.6	59	49.5
	62	67.9	58.7	60.1	53.7
	85.6	92.5	92.4	83.4	94
	69.9	81.8	92.9	64.9	47.7
	83.3	90.5	97.6	69.3	65.6
	87.3	90.5	99	77.2	50.5
	86.7	90.4	97.5	84.4	83.7
	90	94.4	99.2	78.8	96.7
	84.4	88.7	98.4	82.3	96.1
Figure 7D	LSK						ST-HSC						LT-HSC
	no IR 8 days	IR 8 days	IR+BMC 8 days	no IR 5 months	IR+BMC 5 months		no IR 8 days	IR 8 days	IR+BMC 8 days	no IR 5 months	IR+BMC 5 months		no IR 8 days	IR 8 days	IR+BMC 8 days	no IR 5 months	IR+BMC 5 months
	0.105985	0.001101	0.042984	0.067146	0.116076		0.006921	0.000367	0.00197726	0.008662	0.003006		0.003031	0.000184	0	0.015309	0.035171
	0.092728	0	0.02914	0.063434	0.106609		0.004877	0	0	0.001865	0.002026		0.002216	0	0	0.011164	0.025053
	0.064753	0.004446	0.006803	0.030537	0.06912		0.010879	0.000317	0.00061836	0.002657	0.003843		0.00362	0.001272	0	0.001991	0.008847
	0.348156	0.15725	0.021228	0.237699	0.16107		0.011186	0.005079	0	0.033991	0.012563		0.008731	0	0	0.025909	0.021744
	0.11107	0.008502	0.08786	0.1086	0.257106		0.025324	0.00085	0.00101918	0.05849	0.008125		0.020215	0.002551	0.00034265	0.000753	0.040366
	0.18537	0.049131	0.06615	0.039864	0.339273		0.00634	0	0.00030429	0.000643	0.012146		0.015237	0	0	0.003232	0.039016
	0.0715	0.028908	0.157136	0.179422	0.153738		0.006978	0.002168	0	0.014426	0.006226		0.007865	0.005406	0.00045569	0.01317	0.018602
	0.08246	0.015318	0.13908		0.109288		0.00301	0.000426	0.00043115		0.012131		0.059535	0	0		0.011257
		0.002037	0.097173		0.203832			0	0.00775441		0.004729			0	0.00178798		0.011802
		0.003248	0.10584					0.000191	0.00637157					0.001338	0
			0.08352						0.00642269						0
			0.075936						0.00306781						0.00153391
			0.056144						0						0
			0.038512						0						0
			0.071808						0						0
			0.073008						0.00148936						0.00074468
Figure 7E
	Lin-	LSK	ST-HSC	LT-HSC
	36.5	74.7	0	0
	64.6	94.9	0	0
	14.5	36.4	0	0
	66.6	95.3	0	0
	16.1	76.7	0	0
	17	94.5	0	0
	43.3	86.4	0	0
	59.9	93.4	0	0
	27	47.9	7.69	0
	51.2	64.7	0	0
	4.11	15.4	0	0
	50.2	77.8	0	0
	21	54.1	0	0
	21	85.7	0	0
	38	74.1	0	0
	58.6	75.5	0	0
Figure 7F
	Lin-	LSK	ST-HSC	LT-HSC
	58.9	93.8	59.5	88
	63.4	98.2	58.8	88.9
	63.7	94.7	60.7	95.7
	53	72.4	69.2	100
	56.1	91.7	75	88.5
	86.2	88.9	91.3	85.3
	49	80.8	100	100
	68.3	99.6	100	94.3
	68.9	92.9	75	80

## Sheet: Figure 7-figure supplement 2
	PLT						Hb						Basophil							Eosinophil
	no IR 8 days	IR 8 days	IR+BMC 8 days	no IR 5 months	IR+BMC 5 months		no IR 8 days	IR 8 days	IR+BMC 8 days	no IR 5 months	IR+BMC 5 months		no IR 8 days	IR 8 days	IR+BMC 8 days	no IR 5 months	IR+BMC 5 months			no IR 8 days	IR 8 days	IR+BMC 8 days	no IR 5 months	IR+BMC 5 months
	1449	71	108	808	1790		12.5	6.5	7.6	12	12.2		0	0	0	0.1	0			0.02	0	0.02	0.31	0.01
	1384	156	52	289	1719		12.8	7.7	3.1	7.7	12.6		0.16	0	0.01	0	0.02			0.36	0	0.01	0.01	0.08
	825	140	71	446	414		13.3	8.2	3.1	9.4	11.9		0.03	0	0.01	0.01	0.01			0.08	0	0.02	0.02	0.01
	420	119	85	1442	382		12.5	8.1	6.3	13.4	13.3		0	0	0	0	0			0.01	0	0.01	0	0.01
	799	59	98	1454	529		9.4	2.9	6.9	12.2	11.3		0.03	0	0.01	0.03	0.01			0.1	0	0.02	0.1	0.03
	1343	47	102	1393	1188		12.7	3	9	12	12.1		0	0	0	0.01	0.12			0.01	0	0.01	0.03	0.2
	1014	126	77	691	1015		12.6	10.3	8.7	10.8	11.3		0	0	0.01	0	0.07			0	0	0	0.02	0.08
	1074	136	78	198	1513		12.4	10.1	7.9	9.5	13		0.07	0	0	0	0.07			0.19	0	0	0.02	0.2
	1348	76	99	175	925		13.5	8.4	7.7	12.4	11.8		0	0	0	0	0.01			0.01	0	0	0.02	0.02
	1800	100		420	760		14.6	8.1		13	11.8		0.03	0		0.01	0.01			0.07	0		0.02	0.01
	275	76		1047	773		8.7	7.2		12.7	11.7		0	0		0	0.01			0.01	0		0	0.02
	674			1037	586		12.4			8.5	12.1		0.02			0.03	0			0.05			0.07	0.01
	705			1439	1054		8.2			12.9	13.9		0.03			0.01	0			0.13			0.04	0.01
	602				172		10.6				10.6		0.01				0.01			0.01				0.02
					1300						13.3						0.01							0.1

## Sheet: Figure 7-figure supplement 6
Fig.7-suppl.6D
	Lin-	LSK	ST-HSC	LT-HSC
	64.51	98.56	100	95.86
	69.92	97.89	60.32	85.22
	78.22	85.89	73.89	83.96
Fig.7-suppl.6E
	Granulocytes	B cells	Monocytes	T cells	Erythoid
	83.5	93.6	98.2	79.3	70.6
	86.9	88.6	99	80.2	86.9
	75.9	80.6	98	64.9	95.2
